# The Ca<sup>2+</sup> Permeation Mechanism of the Ryanodine Receptor Revealed by a Multi-Site Ion Model

*Aihua Zhang<sup>1</sup>, Hua Yu<sup>1</sup>, Chunhong Liu<sup>1</sup>, and Chen Song<sup>1,2,\*</sup>*

<sup>1</sup>Center for Quantitative Biology, Academy for Advanced Interdisciplinary Studies, Peking University, Beijing, China

<sup>2</sup>Peking-Tsinghua Center for Life Sciences, Academy for Advanced Interdisciplinary Studies, Peking University, Beijing, China

## **Corresponding Author**

\*To whom correspondence should be addressed: E-mail: [c.song@pku.edu.cn](mailto:c.song@pku.edu.cn)

## Abstract

The ryanodine receptors (RyR) are ion channels responsible for the release of  $\text{Ca}^{2+}$  from the sarco/endoplasmic reticulum and play a crucial role in the precise control of  $\text{Ca}^{2+}$  concentration in the cytosol. The detailed permeation mechanism of  $\text{Ca}^{2+}$  through RyR is still elusive. By using molecular dynamics simulations with a specially designed  $\text{Ca}^{2+}$  model, here we show that multiple  $\text{Ca}^{2+}$  accumulate in the upper selectivity filter of RyR1, but only one  $\text{Ca}^{2+}$  can enter and translocate in the narrow pore at a time. The  $\text{Ca}^{2+}$  is nearly fully hydrated during the whole permeation process, with the first solvation shell intact even at the narrowest constrict sites of the selectivity filter and gate. These results present a one-at-a-time permeation pattern for the hydrated ions, which is distinct from the fully/partially dehydrated knock-on permeation in  $\text{K}^+$  and  $\text{Na}^+$  channels and uncovers the underlying reason for the high permeability and low selectivity of the RyR channels.

**KEYWORDS:** Ion Channel; Ryanodine Receptor; Molecular Dynamics; Calcium Ion; Permeation

## Introduction

As an essential messenger in cells, calcium ions ( $\text{Ca}^{2+}$ ) regulate many physiological processes, including neurotransmitter release, muscle contraction, and hormones secretion<sup>1</sup>. The concentration of  $\text{Ca}^{2+}$  in the cytoplasm and organelles is precisely controlled by multiple calcium channels, including the voltage-gated calcium channels in cell membranes and the ryanodine receptors (RyR) in the endoplasmic reticulum (ER) membrane.  $\text{Ca}^{2+}$  also induces conformational changes of a wide range of  $\text{Ca}^{2+}$ -interacting proteins, such as calmodulin and  $\text{Ca}^{2+}$ -activated ion channels, to trigger downstream signal transduction<sup>2</sup>. Although the pathways of calcium signaling are extensively studied, the molecular interaction details between calcium and proteins have yet to be fully elucidated.

To study the detailed interactions between ions and proteins, we can often use molecular dynamics (MD) simulations to provide microscopic and quantitative insights, thereby obtaining the specific functional mechanisms of the relevant proteins<sup>3-6</sup>. However, the conventional models of  $\text{Ca}^{2+}$  are far from accurate in calculating the interaction energies between  $\text{Ca}^{2+}$  and proteins<sup>7-9</sup>, therefore inadequate to study the precise  $\text{Ca}^{2+}$ -protein interactions. As a consequence,  $\text{K}^{+}$  and  $\text{Na}^{+}$  channels have been widely studied by MD simulations, and their detailed permeation mechanisms were revealed<sup>10-17</sup>, but computational studies of  $\text{Ca}^{2+}$  channels are rather limited. Notably, several structures of  $\text{Ca}^{2+}$  channels were resolved recently<sup>18-21</sup>, which provided a solid basis to study their detailed function mechanism further. In particular, the open-state RyR1 channel provides an excellent opportunity for studying  $\text{Ca}^{2+}$  permeation and selectivity<sup>21</sup>, which makes a reliable  $\text{Ca}^{2+}$  model even more desirable.

There have been enormous efforts in trying to develop a more accurate  $\text{Ca}^{2+}$  model. The polarizable force field is theoretically appealing<sup>9</sup>, but its implementation and validation still need further work before being widely accepted and utilized for membrane protein

simulations. Kohagen et al. proposed to scale the partial charges on the  $\text{Ca}^{2+}$  to account for the charge transfer and polarization<sup>22,23</sup>. Another strategy is to represent an ion by distributing electrostatic and Lennard-Jones (LJ) interactions on multiple sites, which can introduce a much larger parameter space and therefore make the ion model more tailorable<sup>24-26</sup>. Unfortunately, none of the existing  $\text{Ca}^{2+}$  models in the non-polarizable classical force field are able to describe the interactions between  $\text{Ca}^{2+}$  and protein quantitatively. Therefore, in the present work, we developed a new multi-site  $\text{Ca}^{2+}$  model particularly optimized for  $\text{Ca}^{2+}$ -protein interaction (inset of Fig. 1), and then utilize this model to study the detailed  $\text{Ca}^{2+}$  permeation mechanism through the RyR1 channel, which showed distinct features from the widely studied  $\text{K}^+$  and  $\text{Na}^+$  channels.

## Results

### The multi-site $\text{Ca}^{2+}$ model behaves well in both water and protein

We designed a seven-site ion model, as shown in the inset of Fig. 1. There are six adjustable parameters, including  $b_{CD}$ ,  $Q_C$ ,  $\epsilon_C$ ,  $\sigma_C$ ,  $\epsilon_D$ , and  $\sigma_D$ , where  $b_{CD}$  is the distance between dummy atoms and the central atom,  $Q_C$  is the charge on the central atom, and the  $\epsilon$ 's and  $\sigma$ 's are the LJ parameters of the central (C) and dummy (D) atoms, respectively. We further distinguish the LJ interactions of  $\text{Ca}^{2+}$  with water and non-water by replacing  $(\epsilon_C, \sigma_C)$  with two sets of  $(\epsilon_C^W, \sigma_C^W)$  and  $(\epsilon_C^{NW}, \sigma_C^{NW})$ , respectively. The charges on all the dummy atoms are the same and determined so that the total charge of the model is  $+2e$ . By adjusting the aforementioned parameters, we obtained a  $\text{Ca}^{2+}$  model that can quantitatively reproduce the energetical and dynamic properties of  $\text{Ca}^{2+}$  in water as well as the  $\text{Ca}^{2+}$ -protein interactions. The resulting  $\text{Ca}^{2+}$  properties in water are shown in Table 1. As can be seen, the hydration free energy ( $\Delta G_h$ ), the first-peak position of the radial distribution function of water

around  $\text{Ca}^{2+}$  ( $R_1$ ), and the number of coordinated water molecules in the first solvent shell ( $N_C$ ) have all reached the target values of experiments. In addition, the residence time of water molecules in the first solvation shell ( $\tau_R$ ) can be optimized to below 100 ps, which solved the common problem of  $\text{Ca}^{2+}$  being too sticky. As there is no solid experimental data about the exact residence time of water, there may be still some room for further improvement. Nonetheless, our model shows that the water residence time in the first solvation shell can be optimized to a considerable extent with the multi-site model, and short residence time is consistent with a previous systematic study<sup>27</sup>.

With our model, the calculated binding energies of  $\text{Ca}^{2+}$  and proteins were also improved to a large extent (Fig. 1). The default  $\text{Ca}^{2+}$  parameters of the CHARMM force field (C36) led to a significant overestimation of ~150–200 kcal/mol<sup>9</sup>, while the average binding-energy discrepancies for ten selected proteins were 6.6 kcal/mol for the Drude polarizable model and -0.2 kcal/mol for our multi-site model, respectively. Therefore, our model is comparable to the quantum mechanics (QM) and polarizable Drude model in calculating the  $\text{Ca}^{2+}$ -protein binding energies, which is of crucial importance in simulating  $\text{Ca}^{2+}$ -protein interactions and  $\text{Ca}^{2+}$  permeation through ion channels.

## **The permeability of the open-state RyR1**

The conventional ion models generally work well in studying ion-protein interactions for  $\text{K}^+$  or  $\text{Na}^+$ , but fail consistently for  $\text{Ca}^{2+}$  ions<sup>9</sup>, and therefore no calcium permeation was observed in previous MD studies of  $\text{Ca}^{2+}$  channels<sup>28</sup>. We performed MD simulations on the type-1 ryanodine receptor (RyR1), an intracellular calcium release channel required for skeletal muscle contraction, with our  $\text{Ca}^{2+}$  model. The open-state structure of RyR1 (PDB ID: 5TAL) was obtained from des Georges et al.'s work<sup>21</sup>. The simulation systems consist of the pore domain of RyR1 embedded in a lipid bilayer of 1-Palmitoyl-2-oleoyl-sn-glycerol-3-phosphocholine (POPC) and an aqueous solution of either 150 mM  $\text{Ca}^{2+}$  or 250 mM  $\text{K}^+$  (Fig.

2a). The protein was restrained to the open-state crystal structure, and a transmembrane potential of 100 mV was applied along the direction from the sarcoplasmic reticulum (SR) lumen to the cytosol.

We first studied the permeation of  $K^+$  through RyR1 as a validation. Three independent 300-ns MD simulations were conducted and generated enough permeation events ( $\sim 500$ ) for statistical analysis (Fig. 2b). The conductance was calculated to be  $910 \pm 39$  pS, which was in good agreement with the experimentally measured conductance of  $\sim 850$  pS with the same ion concentration and indicates that the RyR1 structure under study is indeed in its open state and that the  $K^+$  model in the CHARMM force field is reasonably accurate in describing the interactions between ions and proteins. However, our MD simulations of  $Ca^{2+}$  permeation through the same open-state RyR1 showed that the channel is not permeable to  $Ca^{2+}$  at all with the default  $Ca^{2+}$  parameter of CHARMM. Not a single permeation event was observed in three 500-ns MD trajectories (Fig. 2c). Since the channel is in its open state, this indicated that the default  $Ca^{2+}$  model gave us qualitatively wrong simulation results here, as also observed by another recent study<sup>28</sup>. A close inspection of the MD trajectories showed that the  $Ca^{2+}$  ions were tightly bound to the protein, again confirming that the binding affinity between  $Ca^{2+}$  and protein is too strong with the conventional  $Ca^{2+}$  model. In contrast, when our  $Ca^{2+}$  model was used for the same simulations, we observed continuous  $Ca^{2+}$  permeation as expected (Fig. 2c). The conductance calculated from six 500-ns trajectories is  $141 \pm 30$  pS, which agrees reasonably well with the experimental value of  $\sim 172$  pS with the same ion concentration<sup>29</sup>. Therefore, we believe that our multi-site  $Ca^{2+}$  model is more accurate in studying the permeation behavior of the  $Ca^{2+}$  channel.

### **The $Ca^{2+}$ binding sites in the pore region**

We performed an 800-ns simulation without the transmembrane potential to identify the  $Ca^{2+}$  binding sites in RyR1. The contour plot of the  $Ca^{2+}$  density,  $\rho(R, z)$ , is presented in Fig.

3a, from which two major binding sites in the luminal vestibule (L) and above the selectivity filter constriction (S), and one minor binding site at the gate constriction (G) can be identified within the transmembrane pore. The selectivity filter and gate constrictions are located near the residues G4894 and Q4933, respectively (Fig. 3b). The corresponding positions in the contour plot are indicated by solid lines labeled with SF and GT in Fig. 3a. The isosurfaces of probability density corresponding to these binding sites are shown in Fig. 3b. By calculating the residence time of carboxylate oxygen of negatively charged residues within a sphere with a radius of 5 Å around the binding site L, we identified that the binding site L is formed by the interaction of Ca<sup>2+</sup> ions with D4899, E4900, and D4903 residues (Fig. 3b), which agrees well with previous experimental and computational studies<sup>28,30</sup>. The large probability of finding Ca<sup>2+</sup> in the selectivity filter also indicates that the Ca<sup>2+</sup> can easily accumulate around the luminal vestibule and move into the upper filter, and the rate-determining step of permeation is the process of passing through the lower selectivity filter or gate constrictions. In addition, a continuous cytosolic binding region was found near residues D4938, E4942, and D4945, which interact with the permeating Ca<sup>2+</sup> and may influence the ion permeability as well. This is consistent with a previous experimental study showing that D4938 and D4945 determines the ion flux and selectivity<sup>31</sup>.

### **The Ca<sup>2+</sup> ions are fully hydrated during permeation**

We calculated the number of oxygen atoms coordinated with the permeating Ca<sup>2+</sup> and monitored from which residues these oxygen atoms were (water or protein). As shown in Fig. 4a, the open-state RyR pore is relatively wide compared to K<sup>+</sup> and Na<sup>+</sup> channels. As the first solvation shell is around 2.4 Å from the Ca<sup>2+</sup> and the radius of a water molecule is usually considered to be 1.4 Å, we consider the pore region with a radius less than 4.0 Å to be the narrow pore region that contains the rate-limiting constriction sites. Interestingly, the average number of oxygen atoms coordinated with the Ca<sup>2+</sup> was almost constant during the

permeation process of  $\text{Ca}^{2+}$ , as shown in Fig. 4a (right panel), and nearly all of these oxygen atoms were from water molecules within the narrow pore region. This clearly indicates that the permeating  $\text{Ca}^{2+}$  ions do not need to dehydrate when permeating through the open-state pore, and therefore the first solvation shell was intact in the narrow pore region. On the other hand, in the wide upper selectivity filter, one of the water molecules coordinated with  $\text{Ca}^{2+}$  can be replaced by the oxygen from E4900 (Fig. 4a), simply because the strong electrostatic attraction between  $\text{Ca}^{2+}$  and E4900 pushed one of the coordinated water molecules away. A similar phenomenon was observed near D4938. It should be noted that, the water replacement at these sites are not caused by the steric dehydration when ions passing through a narrow pore as observed in  $\text{K}^+$  and  $\text{Na}^+$  channels, but rather due to strong electrostatic attraction from negatively charged residues in a wide vestibule ( $r > 5 \text{ \AA}$ ), and therefore should not be considered as dehydration due to the permeation.

### **The $\text{Ca}^{2+}$ permeation pattern**

The narrow region of the channel consists of the lower selectivity filter, the cavity, and the gate, which can be divided into two chambers by the saddle points of the  $\text{Ca}^{2+}$  density, as indicated by the dashed lines in Fig. 3a. The upper and lower chambers contain the binding sites S and G, respectively. The typical permeation pattern of  $\text{Ca}^{2+}$  ions is shown in Fig. 4b, from which it can be seen that permeation through the narrow pore region of the channel occur mainly in a one-at-a-time manner, meaning that there is only one  $\text{Ca}^{2+}$  residing in this narrow pore region, either in the upper or the lower chamber. The probability of both chambers being occupied by  $\text{Ca}^{2+}$  was only 2.4% in the trajectories, while the probability of only one chamber being occupied was 68.6%. Therefore, most of the time, only one  $\text{Ca}^{2+}$  can occupy the narrow pore region when permeating through the open-state channel. This permeation pattern is distinct from  $\text{K}^+$  and  $\text{Na}^+$  channels, in which usually both the narrow selectivity filter and cavity can be occupied by multiple permeating ions at the same



time<sup>11,13,16</sup>. This is probably due to the fact that the electrostatic repulsion is much stronger between divalent ions than monovalent ions, and that RyR1 has a much shorter narrow selectivity filter region than typical K<sup>+</sup> and Na<sup>+</sup> channels (Fig. 4a).

## Discussion

The interaction between Ca<sup>2+</sup> and protein is of great importance in studying Ca<sup>2+</sup>-mediated biological processes. Although the multi-site ion model cannot really represent the charge transfer and polarization effect explicitly, the simulation results showed that our new model behaves much better than conventional single-point ion models. Moreover, our model is entirely consistent with the currently widely used non-polarizable force fields, such as CHARMM and AMBER, and therefore can be easily used in MD simulations. As shown in the result section, our seven-site Ca<sup>2+</sup> model can reproduce the solvation properties of Ca<sup>2+</sup>, including the hydration energy, the first solvation shell size (first-peak position of RDF), the coordination number, and the residence time of water in the first solvation shell, as well as the Ca<sup>2+</sup>-protein binding energies in a more quantitative way that is comparable to quantum chemistry calculations. The optimized Ca<sup>2+</sup> model was validated by simulations of the RyR1 ion channel. In contrast to the conventional Ca<sup>2+</sup> model, where ions get stuck in the channel in MD simulations, our new model resulted in the continuous permeation of Ca<sup>2+</sup> through the channel, and the calculated conductance is in good agreement with the experimental electrophysiology result. Therefore, we believe this multi-site Ca<sup>2+</sup> model can be widely used in simulating many Ca<sup>2+</sup>-involved bio-systems in addition to ion channels, and our simulations of RyR can provide detailed information about the Ca<sup>2+</sup> permeation mechanism.

The ion binding and permeation mechanisms have been widely studied for K<sup>+</sup> and Na<sup>+</sup> channels with molecular dynamics simulations<sup>10-12,14-17</sup>, but only rarely studied for Ca<sup>2+</sup> channels with conventional ion models<sup>28</sup>. From our MD simulations with the new multi-site

Ca<sup>2+</sup> model, the major Ca<sup>2+</sup> binding sites in the open-state RyR1 were determined to be near the D4900 and G4894 residues on the luminal side, and the rate-determining step of permeation is found to be the step of passing through the selectivity filter constriction, where Ca<sup>2+</sup> dwell for a relatively long time before passing through (Fig. 4b). Our simulation indicated that Ca<sup>2+</sup> can easily accumulate in the wide upper selectivity filter, as shown by the high Ca<sup>2+</sup> density from our equilibrium simulations (Fig. 3a). On average, there were about five Ca<sup>2+</sup> or eight K<sup>+</sup> in the selectivity filter in the presence of a 100-mv transmembrane potential (Fig. S1). This indicates that K<sup>+</sup> cannot fill up the electrostatic energy well in the selectivity filter as effectively as Ca<sup>2+</sup> do, which agrees with the previously proposed selectivity mechanism of the charge-space competition<sup>32</sup>.

The Ca<sup>2+</sup> permeate through the narrow pore region of the channel following a one-at-a-time manner (Fig. 4b), which is distinct from the well-studied “knock-on” mechanism in K<sup>+</sup> and Na<sup>+</sup> channels. Previous studies have shown that multiple monovalent ions can enter the narrow pore region of the K<sup>+</sup> and Na<sup>+</sup> channels, and line up to facilitate the so-called ‘knock-on’ permeation, either tightly or loosely coupled<sup>10–16</sup>. It is not the case for the RyR channel, as only one Ca<sup>2+</sup> was observed in the narrow pore region ( $r < 4 \text{ \AA}$ ) during the Ca<sup>2+</sup> permeation in our MD simulations, and this region contains both the lower selectivity filter and cavity. There may be two reasons for this different permeation pattern, one is that the narrow selectivity filter of RyR is shorter compared to that of K<sup>+</sup> and Na<sup>+</sup> channels (Fig. 4a), which can hardly accommodate multiple ions, and the second reason being that the electrostatic repulsion between divalent ions is much stronger than monovalent ions, which makes it energetically unfavorable for multiple divalent cations to sit side by side within a certain distance. In fact, we observed that when there was a Ca<sup>2+</sup> in the cavity, other Ca<sup>2+</sup> cannot enter the lower selectivity filter (Fig. 4b). Therefore, this unique one-at-a-time permeation pattern observed in our MD simulations occurs due to both structural features of

RyR and strong repulsive interactions of divalent cations, which was not observed in previously studied ion channels.

Another distinct permeation feature of RyR is that  $\text{Ca}^{2+}$  ions are nearly fully hydrated during the translocation along the narrow pore region. Previous studies have shown that  $\text{K}^+$  is nearly fully dehydrated<sup>11,16</sup> and  $\text{Na}^+$  is partially dehydrated<sup>13,14</sup> during permeation, meaning all of the water molecules or at least several water molecules within the first solvation shell of the ions must be removed or replaced by other residues at the narrowest constriction sites. In fact, this dehydration process was believed to be the key factor responsible for the ion selectivity of the channels<sup>13,17,33</sup>, as different ions have different sized solvation shell and selectivity filters with different steric and chemical features can discriminate them by the free energy difference during the dehydration process. Interestingly, we did not observe such a dehydration behavior when  $\text{Ca}^{2+}$  was permeating through the RyR1 channel. As shown in Fig. 4a, the number of water molecules are nearly constant in the narrow pore region and the oxygen atoms coordinating with the  $\text{Ca}^{2+}$  from the protein is nearly zero throughout, indicating that the first solvation shell of the  $\text{Ca}^{2+}$  is intact during permeation, and no dehydration occurred when the ion passing through the narrow constriction sites in the selectivity filter and lower gate. This finding provides a clear picture on the exact hydration states of  $\text{Ca}^{2+}$  ions as they pass through the pore, which is consistent with earlier speculation that ion dehydration may not be a significant component of selectivity or permeation<sup>34</sup>. From the structural point of view, the open-state RyR1 is wider than  $\text{K}^+$  and  $\text{Na}^+$  channels in the selectivity filter region (Fig. 4a), and therefore sterically allows the  $\text{Ca}^{2+}$  to permeate with its first solvation shell intact. On the one hand, this allows highly efficient  $\text{Ca}^{2+}$  permeation to regulate ion concentration in the cytosol for muscle contraction and heartbeat, which is otherwise hard to imagine as  $\text{Ca}^{2+}$  has a much higher dehydration energy compared to  $\text{K}^+$  and  $\text{Na}^+$ . On the other hand this probably also leads to the weaker ion selectivity of RyR1,

compared to the highly selective  $K_v$ ,  $Na_v$ , and  $Ca_v$  channels, since the powerful dehydration-based selectivity mechanism cannot be utilized here.

In summary, we developed a new multi-site  $Ca^{2+}$  model which behaves well when studying its interactions with proteins. It is entirely consistent with the widely-used CHARMM force field, and we are expanding to other force fields and divalent ions as well. With the new  $Ca^{2+}$  model, we revealed the detailed  $Ca^{2+}$  permeation process through the open-state RyR1, and discovered that multiple  $Ca^{2+}$  ions can accumulate in the wide upper selectivity filter, and then permeate through the narrow pore region following a one-at-a-time pattern, in which the permeating  $Ca^{2+}$  is fully hydrated with an intact first solvation shell (Fig. 5), distinct from the widely studied  $K^+$  and  $Na^+$  channels. These permeation details shed lights on the high efficiency and weak cation selectivity of the  $Ca^{2+}$  permeation through the RyR channels.

## Material and Methods

### I. Model Optimization

#### a. Simulations for Parameterization

All the MD simulations for the ion model parameterization were performed with OpenMM (version 7.0.1)<sup>35</sup>, as the package is highly flexible and can be easily customized with a Python interface, and the CHARMM force field<sup>36</sup> (source: `toppar_c36_aug15.tgz`) was utilized in this work.

We built an ion-in-water system to optimize the ion properties in the water, which consists of one rigid multi-site  $\text{Ca}^{2+}$  ion in a cubic water box of  $3 \times 3 \times 3 \text{ nm}^3$ . The TIPS3P water model was used in consistency with the CHARMM force field. In our simulations, NPT ensembles were generated by integrating the Langevin dynamics with a time-step of 2 fs and a collision frequency of  $5 \text{ ps}^{-1}$ . The temperature was maintained at 298 K, and the pressure was regulated at 1 bar using a Monte Carlo barostat. Water molecules were kept rigid during simulations, and the cutoff of non-bonded interactions was 1 nm. For calculations of the radial distribution function, coordination number, and residence time, a 20-ns trajectory was generated. For hydration free energy calculations, 1-ns trajectories were generated for each of the 14 alchemical states (please also see below). The hydration free energy was estimated using the python implementation of the multistate Bennett acceptance ratio downloaded from <https://github.com/choderalab/pymbar>. The properties related to the radial distribution function were calculated using MDTRAJ<sup>37</sup>.

To optimize the ion-protein interactions, we used the  $\text{Ca}^{2+}$ -Protein systems previously investigated by Li et al.<sup>9</sup>, and used OpenMM and CHARMM force field to perform the calculations as well (please see below for details).

## b. Fitness Functions for Optimization

We define two fitness functions to optimize the parameters of our multi-site  $\text{Ca}^{2+}$  model. One is designated as the protein-fitness function ( $\lambda_p^2$ ) and the other as the water-fitness function ( $\lambda_w^2$ ). The protein-fitness function is defined against a dataset of quantum-mechanically calculated  $\text{Ca}^{2+}$ -protein binding energies,  $\Delta E_{p,f}^{QM}$ , where  $p$  identifies the index among  $N_p$  ( $= 10$ ) proteins, and  $f$  indexes  $N_f$  ( $= 21$ ) trajectory snapshots for each protein. The formula for  $\lambda_p^2$  is

$$\lambda_p^2 = \sum_{p=1}^{N_p} \left[ \overline{\Delta E_p}^{MM} - \left( \overline{\Delta E_p}^{QM} + \Delta E_C \right) \right]^2,$$

where  $\overline{\Delta E_p}^X = \sum_f \Delta E_{p,f}^X / N_f$  ( $X = QM, MM$ ), and  $MM$  indicates the molecule-mechanical results. Due to limitations of the methodology level and the basis-set size used in quantum-mechanical calculations, a systematic correction of binding energies ( $\Delta E_C = 10$  kcal/mol) is added to  $\overline{\Delta E_p}^{QM}$  following Li et al.'s strategy<sup>9</sup>.

In addition to  $\text{Ca}^{2+}$ -protein interactions, we also optimize our model to reproduce its energetical, structural, and dynamic properties in water. Specifically, these properties include the hydration free energy ( $\Delta G_h$ ), the first-peak position of radial distribution function ( $R_1$ ), the coordination number ( $N_C$ ), and the residence time of water in the first coordination shell ( $\tau_R$ ). The water-fitness function is defined as

$$\lambda_w^2 = \left( \frac{\Delta G_h^t - \Delta G_h^e}{\Delta G_h^w} \right)^2 + \left( \frac{R_1^t - R_1^e}{R_1^w} \right)^2 + \left( \frac{N_C^t - N_C^e}{N_C^w} \right)^2 + \left( \frac{\tau_R^t - \tau_R^e}{\tau_R^w} \right)^2,$$

where quantities with superscripts of  $t$ ,  $e$ , and  $w$  stand for theoretical, experimental, and weighting values, respectively.

### c. Target Properties of $\text{Ca}^{2+}$ in Water

We followed the approach of Mamatkulov et al.<sup>38</sup> to determine the target hydration energy of  $\text{Ca}^{2+}$  (-1504 kJ/mol) as

$$\Delta G_h^e(\text{Ca}^{2+}) = \Delta G(\text{CaCl}_2) - 2\Delta G_h(\text{Cl}^-) - \Delta G_{press} - \Delta G_{surf},$$

where  $\Delta G(\text{CaCl}_2)$  is the measured hydration energy of  $\text{CaCl}_2$ <sup>39</sup>,  $\Delta G_h(\text{Cl}^-)$  the theoretical hydration energy determined from Smith-Dang parameters<sup>40</sup> for  $\text{Cl}^-$ ,  $\Delta G_{press}$  the energy needed to compress one mole of ion gas at 1 atm into a liter, and  $\Delta G_{surf}$  the energy change of crossing the air-water interface for 1 mol of ions. Marcus assessed the Ca-O internuclear distances in calcium salt solutions from different studies and concluded that the generally consistent result is 0.242 nm<sup>41</sup>, which was used as our target value for  $R_1^e$ . A recent neutron diffraction study<sup>42</sup> revealed that the average number of water molecules in the first hydration shell of  $\text{Ca}^{2+}$  is close to 7, which we took as the target value for  $N_C^e$ . It is difficult to experimentally determine the residence time of water molecules in the first hydration shell of the calcium ion<sup>43</sup>, and a nuclear magnetic resonance (NMR) study estimated its value to be less than 100 ps<sup>44</sup>. Since the existing  $\text{Ca}^{2+}$  models generally overestimate  $\tau_R$ , we set  $\tau_R^e$  as zero in the course of optimization and checked the final result so as to be the same order of magnitude as 100 ps. The numerical values for the targeted experimental properties and their corresponding weights are listed in the second and third rows of Table S1, respectively.

### d. Target Binding Energies of $\text{Ca}^{2+}$ with Proteins

We followed Li et al.'s protocol to calculate the binding energies between  $\text{Ca}^{2+}$  and proteins<sup>9</sup>. As noted by Li et al., the default single-site model of  $\text{Ca}^{2+}$  in the CHARMM C36 force field generally overestimates the  $\text{Ca}^{2+}$ -protein binding energies by  $\sim 150 - 200$  kcal/mol with respect to quantum-mechanical binding energies. They selected 10 high-resolution crystal structures of  $\text{Ca}^{2+}$ -binding enzymatic proteins and performed MD simulations of the solvated proteins. From the equilibrated trajectories, 21 conformation snapshots were extracted for each protein and truncated to include atoms within a sphere of  $\sim 0.55$  nm around the ion. Quantum mechanical calculations were then carried out with the truncated models to obtain a dataset of binding energies, which is used in this work to optimize the multi-site  $\text{Ca}^{2+}$  model. For the systematic correction of binding energies ( $\Delta E_C$ ) that is added to  $\overline{\Delta E_p}^{QM}$ , we use an estimation of 10 kcal/mol as Li et al. did in their work.

## e. Calculation of Properties from Simulations

The theoretical hydration energy,  $\Delta G_h^t$ , consists of two terms, i.e.

$$\Delta G_h^t = \Delta G_h^{alchem} + \Delta G_h^{fs}.$$

The first term refers to the free energy change corresponding to alchemically switching off the ion-water electrostatic and LJ interactions, and the second term is a correction due to the finite-size simulation box. It took ten and four steps to switch off the electrostatic and LJ interactions in our MD simulations, respectively. MD trajectories (1 ns) of one ion in a cubic water box (3 nm) were used to estimate the alchemical free energy by the method of multistate Bennett acceptance ratio<sup>45</sup>. For the finite-size correction, we took the formula derived by Hummer et al.<sup>46</sup>,

$$\Delta G_h^{fs} = Z^2 e^2 \left[ -\frac{\xi_{EW}}{2\epsilon_r} + \left( 1 - \frac{1}{\epsilon_r} \right) \frac{\pi R_1^2}{3L^3} \right],$$



where  $Ze$  is the ion charge,  $\xi_{EW}$  is the Wigner potential,  $\epsilon_r$  ( $= 82$ ) is the relative dielectric constant, and  $L$  ( $= 3$  nm) is the box size.

The first-peak position of the radial distribution function  $R_1^t$  was calculated using the MDTRAJ software<sup>37</sup> from a 20-ns trajectory, and the coordination number  $N_C^t$  was computed by the integration of the first peak. We followed the definition described by Impey et al.<sup>47</sup> to calculate the residence time  $\tau_R^t$ . First, the residence time distribution  $n_{ion}(t)$  was computed as

$$n_{ion}(t) = \frac{1}{N_t} \sum_{n=1}^{N_t} \sum_{j=1}^{N_w} P_j(t_n, t; t^*),$$

where  $N_t$  is the number of time frames and  $N_w$  is the number of water molecules.  $P_j(t_n, t; t^*)$  takes a value 1 if the water molecule  $j$  stays in the first hydration shell from  $t_n$  to  $t_n + t$  without leaving for any period larger than  $t^*$ , and takes the value 0 otherwise. Then,  $n_{ion}(t)$  was fitted with  $n_0 \exp(-t/\tau_R^t)$  to obtain  $\tau_R^t$ .

The molecule-mechanical  $\text{Ca}^{2+}$ -protein binding energies ( $\Delta E_{p,f}^{MM}$ ) were simply calculated as the potential energy difference between  $\text{Ca}^{2+}$ -bound and  $\text{Ca}^{2+}$ -free configurations. Extra effort is required to first minimize the potential energies of  $\text{Ca}^{2+}$ -binding configurations with respect to the ion's orientation, since the multi-site model has lower symmetry than a single-point model.

## f. Optimization Strategy

First, we did a thorough scan and prescreening, using the conventional optimization routines (such as conjugate gradient and basin hopping), random sampling, and sifting the parameter space by the properties described above in sequence. Initially, we focused on six

parameters ( $b_{CD}, Q_C, \varepsilon_C, \sigma_C, \varepsilon_D, \sigma_D$ ), i.e., treating interactions with water and protein on an equal footing. The searched parameter space as shown in Table S2 is determined from previous works<sup>48,49</sup>, and we substantially extended the range of  $Q_C, \varepsilon_C$ , and  $\varepsilon_D$  based on our optimization results. However, after systematic optimization, the calculated water properties and protein binding energies were still slightly off from the target values. Therefore, we further split  $(\varepsilon_C, \sigma_C)$  into  $(\varepsilon_C^{NW}, \sigma_C^{NW})$  and  $(\varepsilon_C^W, \sigma_C^W)$ , thus calculating the interactions of  $\text{Ca}^{2+}$  with protein and water separately. In fact, we took a two-step strategy to optimize our multi-site model. First, the water-fitness function  $\lambda_w^2$  was minimized to obtain optimal values for  $(b_{CD}, Q_C, \varepsilon_C^W, \sigma_C^W, \varepsilon_D, \sigma_D)$ . Second, with the parameters of  $(b_{CD}, Q_C, \varepsilon_D, \sigma_D)$  fixed, the protein-fitness function  $\lambda_p^2$  was scanned with a two-dimension grid to find the best values of  $(\varepsilon_C^{NW}, \sigma_C^{NW})$  that reproduce quantum-mechanical  $\text{Ca}^{2+}$ -protein binding energies. Due to the roughness of  $\lambda_w^2$  owing to the stochastic nature of the calculation, we developed a simple yet effective steep-descent-like algorithm that alternately searches along each dimension of the parameter space instead of the gradient. The parameter searching along each dimension was performed at linearly spaced steps, which were then finely tuned near the local minimum of a finite interval centering at the current minimal point. We used this strategy to further optimize the top parameters obtained in the initial stage of searching, which indeed yielded more satisfactory results. We found that the minimization mainly took place in the dimensions other than  $\varepsilon_C^W$  and  $\varepsilon_D$ , which indicated that the landscape of the water-fitness function is much smoother along these two dimensions. Therefore, we selected a couple of combinations of  $(\varepsilon_C^W, \varepsilon_D)$  based on the scanning results and carried out further optimization until the fitness value was sufficiently low.

## II. Details of Permeation Simulation

To study the permeation of  $\text{Ca}^{2+}$  through RyR1, we performed MD simulations with GROMACS<sup>50</sup> version 5.1.3 with the CHARMM36 force field<sup>36</sup> and the TIPS3P water model. The channel pore domain (residue 4820-4956) of the cryo-EM structure of the opened RyR1<sup>21</sup> (PDB ID: 5TAL) was used as the starting structure. The *OPM*<sup>51</sup> web server and Membrane Builder in CHARMM-GUI<sup>52</sup> were used to build four POPC-RyR1 simulation systems.

A POPC-RyR1 simulation system with about 150 mM of calcium ions and a POPC-RyR1 simulation system with about 250 mM of potassium ions were built to calculate the conductance of the calcium ions and potassium ions with a transmembrane potential of 100 mV. Three 500-ns trajectories were conducted for the former system, and three 300-ns trajectories for the latter.

Another POPC-RyR1 simulation system with about 150 mM calcium ions was built to calculate the conductance of the calcium ions with our new calcium model with the same transmembrane potential of 100 mV. As the ion model cannot be simulated as a rigid body with Gromacs, we used bond and angle restraints to make the multi-site  $\text{Ca}^{2+}$  model as rigid as possible, which affect the thermodynamics of the  $\text{Ca}^{2+}$  to a minor extent. Six independent 500-ns trajectories were conducted. And, one 800-ns trajectory was run for the same system but without an electric field to obtain the stable binding sites of the calcium ions in the open-state RyR1.

All the simulation systems were first equilibrated with the standard CHARMM-GUI equilibration protocol followed by the production simulations with the position restraints applied on the  $\alpha$  carbon of the protein (with a force constant of  $1000 \text{ kJ}\cdot\text{mol}^{-1}\cdot\text{nm}^{-2}$ ). For all the production simulations, the periodic boundary conditions were used and the time step was 2 fs. The v-rescale algorithm with a time constant of 0.5 ps was used to maintain the

temperature at 310 K, and the Parrinello-Rahman algorithm<sup>53</sup> with a time constant of 1 ps was used to maintain the pressure at 1.0 bar. The Particle-mesh Ewald method<sup>54</sup> was used to calculate electrostatics, and the cut-off length of the van der Waals interaction was 1.2 nm.

## Acknowledgement

We thank Prof. Sergei Noskov and Prof. Roland R. Netz for data sharing and discussions with us. The research was supported by grants from the Ministry of Science and Technology of China (National Key Research & Development Program of China, 2016YFA0500401), the National Natural Science Foundation of China (grant no. 21873006), and the Young Thousand Talents Program of China. Part of the molecular dynamics simulation was performed on the Computing Platform of the Center for Life Sciences at Peking University.

## References

1. Carafoli, E. Calcium signaling: A tale for all seasons. *Proc. Natl. Acad. Sci.* **99**, 1115 (2002).
2. Clapham, D. E. Calcium Signaling. *Cell* **131**, 1047–1058 (2007).
3. Dror, R. O., Dirks, R. M., Grossman, J. P., Xu, H. & Shaw, D. E. Biomolecular Simulation: A Computational Microscope for Molecular Biology. *Annu. Rev. Biophys.* **41**, 429–452 (2012).
4. Maffeo, C., Bhattacharya, S., Yoo, J., Wells, D. & Aksimentiev, A. Modeling and Simulation of Ion Channels. *Chem. Rev.* **112**, 6250–6284 (2012).
5. Roux, B. Ion channels and ion selectivity. *Essays Biochem.* **61**, 201–209 (2017).

6. Hollingsworth, S. A. & Dror, R. O. Molecular Dynamics Simulation for All. *Neuron* **99**, 1129–1143 (2018).
7. Beglov, D. & Roux, B. Finite representation of an infinite bulk system: Solvent boundary potential for computer simulations. *J. Chem. Phys.* **100**, 9050–9063 (1994).
8. Åqvist, J. Ion-water interaction potentials derived from free energy perturbation simulations. *J. Phys. Chem.* **94**, 8021–8024 (1990).
9. Li, H. *et al.* Representation of Ion–Protein Interactions Using the Drude Polarizable Force-Field. *J. Phys. Chem. B* **119**, 9401–9416 (2015).
10. Åqvist, J. & Luzhkov, V. Ion permeation mechanism of the potassium channel. *Nature* **404**, 881–884 (2000).
11. Bernèche, S. & Roux, B. Energetics of ion conduction through the K<sup>+</sup> channel. *Nature* **414**, 73–77 (2001).
12. Furini, S. & Domene, C. Atypical mechanism of conduction in potassium channels. *Proc. Natl. Acad. Sci.* **106**, 16074–16077 (2009).
13. Corry, B. & Thomas, M. Mechanism of Ion Permeation and Selectivity in a Voltage Gated Sodium Channel. *J. Am. Chem. Soc.* **134**, 1840–1846 (2012).
14. Chakrabarti, N. *et al.* Catalysis of Na<sup>+</sup> permeation in the bacterial sodium channel NaVA<sub>b</sub>. *Proc. Natl. Acad. Sci.* **110**, 11331–11336 (2013).
15. Ulmschneider, M. B. *et al.* Molecular dynamics of ion transport through the open conformation of a bacterial voltage-gated sodium channel. *Proc. Natl. Acad. Sci.* **110**, 6364–6369 (2013).
16. Kopfer, D. A. *et al.* Ion permeation in K<sup>+</sup> channels occurs by direct Coulomb knock-on. *Science* **346**, 352–355 (2014).
17. Kopec, W. *et al.* Direct knock-on of desolvated ions governs strict ion selectivity in K<sup>+</sup> channels. *Nat. Chem.* **10**, 813–820 (2018).

18. Wu, J. *et al.* Structure of the voltage-gated calcium channel Ca<sub>v</sub>1.1 complex. *Science* **350**, (2015).
19. Yan, Z. *et al.* Structure of the rabbit ryanodine receptor RyR1 at near-atomic resolution. *Nature* **517**, 50–55 (2015).
20. Wu, P. *et al.* Structural basis for the gating mechanism of the type 2 ryanodine receptor RyR2. *Science* **5324**, 1–17 (2016).
21. des Georges, A. *et al.* Structural Basis for Gating and Activation of RyR1. *Cell* **167**, 145-157.e17 (2016).
22. Kohagen, M., Mason, P. E. & Jungwirth, P. Accurate Description of Calcium Solvation in Concentrated Aqueous Solutions. *J. Phys. Chem. B* **118**, 7902–7909 (2014).
23. Kohagen, M., Lepšík, M. & Jungwirth, P. Calcium Binding to Calmodulin by Molecular Dynamics with Effective Polarization. *J. Phys. Chem. Lett.* **5**, 3964–3969 (2014).
24. Aqvist, J. & Warshel, A. Free energy relationships in metalloenzyme-catalyzed reactions. Calculations of the effects of metal ion substitutions in staphylococcal nuclease. *J. Am. Chem. Soc.* **112**, 2860–2868 (1990).
25. Saxena, A. & Sept, D. Multisite ion models that improve coordination and free energy calculations in molecular dynamics simulations. *J. Chem. Theory Comput.* **9**, 3538–3542 (2013).
26. Duarte, F. *et al.* Force field independent metal parameters using a nonbonded dummy model. *J. Phys. Chem. B* **118**, 4351–4362 (2014).
27. Friedman, H. Hydration complexes-some firm results and some pressing questions. *Chem. Scr.* **25**, 42–48 (1985).
28. Heinz, L. P., Kopec, W., Groot, B. L. de & Fink, R. H. A. In silico assessment of the conduction mechanism of the Ryanodine Receptor 1 reveals previously unknown exit pathways. *Sci. Rep.* **8**, 6886 (2018).

29. Smith, J. S. *et al.* Purified ryanodine receptor from rabbit skeletal muscle is the calcium-release channel of sarcoplasmic reticulum. *J. Gen. Physiol.* **92**, 1 (1988).
30. Wang, Y., Xu, L., Pasek, D. A., Gillespie, D. & Meissner, G. Probing the Role of Negatively Charged Amino Acid Residues in Ion Permeation of Skeletal Muscle Ryanodine Receptor. *Biophys. J.* **89**, 256–265 (2005).
31. Xu, L., Wang, Y., Gillespie, D. & Meissner, G. Two Rings of Negative Charges in the Cytosolic Vestibule of Type-1 Ryanodine Receptor Modulate Ion Fluxes. *Biophys. J.* **90**, 443–453 (2006).
32. Gillespie, D., Xu, L., Wang, Y. & Meissner, G. (De)constructing the Ryanodine Receptor: Modeling Ion Permeation and Selectivity of the Calcium Release Channel. *J. Phys. Chem. B* **109**, 15598–15610 (2005).
33. Noskov, S. Y., Bernèche, S. & Roux, B. Control of ion selectivity in potassium channels by electrostatic and dynamic properties of carbonyl ligands. *Nature* **431**, 830–834 (2004).
34. Gillespie, D., Xu, L. & Meissner, G. Selecting Ions by Size in a Calcium Channel: The Ryanodine Receptor Case Study. *Biophys. J.* **107**, 2263–2273 (2014).
35. Eastman, P. *et al.* OpenMM 7: Rapid development of high performance algorithms for molecular dynamics. *PLOS Comput. Biol.* **13**, e1005659 (2017).
36. Brooks, B. R. *et al.* CHARMM: The Biomolecular Simulation Program. *J. Comput. Chem.* **30**, 1545–1614 (2009).
37. McGibbon, R. T. *et al.* MDTraj: A Modern Open Library for the Analysis of Molecular Dynamics Trajectories. *Biophys. J.* **109**, 1528 – 1532 (2015).
38. Mamatkulov, S., Fyta, M. & Netz, R. R. Force fields for divalent cations based on single-ion and ion-pair properties. *J. Chem. Phys.* **138**, 024505 (2013).
39. Marcus, Y. *Ion properties*. **1**, (CRC Press, 1997).

40. Dang, L. X. & Smith, D. E. Molecular dynamics simulations of aqueous ionic clusters using polarizable water. *J. Chem. Phys.* **99**, 6950–6956 (1993).
41. Marcus, Y. Ionic radii in aqueous solutions. *Chem. Rev.* **88**, 1475–1498 (1988).
42. Badyal, Y. S., Barnes, A. C., Cuello, G. J. & Simonson, J. M. Understanding the Effects of Concentration on the Solvation Structure of Ca<sup>2+</sup> in Aqueous Solution. II: Insights into Longer Range Order from Neutron Diffraction Isotope Substitution. *J. Phys. Chem. A* **108**, 11819–11827 (2004).
43. Ohtaki, H. & Radnai, T. Structure and dynamics of hydrated ions. *Chem. Rev.* **93**, 1157–1204 (1993).
44. Friedman, H. Hydration complexes-some firm results and some pressing questions. *Chem. Scr.* **25**, 42–48 (1985).
45. Shirts, M. & Chodera, J. Statistically optimal analysis of samples from multiple equilibrium states. *J. Chem. Phys.* **129**, 124105 (2008).
46. Hummer, G., Pratt, L. R. & García, A. E. Ion sizes and finite-size corrections for ionic-solvation free energies. *J. Chem. Phys.* **107**, 9275–9277 (1997).
47. Impey, R. W., Madden, P. A. & McDonald, I. R. Hydration and mobility of ions in solution. *J. Phys. Chem.* **87**, 5071–5083 (1983).
48. Duarte, F. *et al.* Force Field Independent Metal Parameters Using a Nonbonded Dummy Model. *J. Phys. Chem. B* **118**, 4351–4362 (2014).
49. Saxena, A. & Sept, D. Multisite Ion Models That Improve Coordination and Free Energy Calculations in Molecular Dynamics Simulations. *J. Chem. Theory Comput.* **9**, 3538–3542 (2013).
50. Abraham, M. J. *et al.* GROMACS: High performance molecular simulations through multi-level parallelism from laptops to supercomputers. *SoftwareX* **1–2**, 19–25 (2015).



51. Lomize, M. A., Pogozheva, I. D., Joo, H., Mosberg, H. I. & Lomize, A. L. OPM database and PPM web server: resources for positioning of proteins in membranes. *Nucleic Acids Res.* **40**, D370-376 (2012).
52. Jo, S., Kim, T., Iyer, V. G. & Im, W. CHARMM-GUI: A web-based graphical user interface for CHARMM. *J. Comput. Chem.* **29**, 1859–1865 (2008).
53. Parrinello, M. & Rahman, A. Polymorphic transitions in single crystals: A new molecular dynamics method. *J. Appl. Phys.* **52**, 7182–7190 (1981).
54. Darden, T., York, D. & Pedersen, L. Particle mesh Ewald: An N·log(N) method for Ewald sums in large systems. *J. Chem. Phys.* **98**, 10089–10092 (1993).

**Table 1. The target properties of  $\text{Ca}^{2+}$  in water and the computed property values from the simulations with our  $\text{Ca}^{2+}$  model.**

|          | $\Delta G_h$ (kJ/mol) | $R_1$ (nm) | $N_C$ | $\tau_R$ (ps) |
|----------|-----------------------|------------|-------|---------------|
| Target   | -1504.0               | 0.242      | 7.0   | ~100          |
| Computed | -1503.9               | 0.242      | 7.0   | 75            |

## Figures

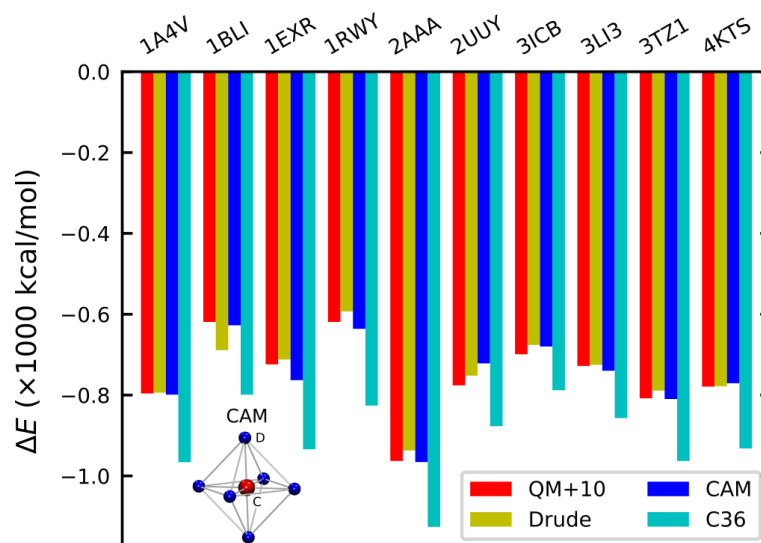

**Figure 1.** The calcium-protein binding energies calculated with different methods. Our multi-site  $\text{Ca}^{2+}$  model (CAM) consists of a central atom (C) and six dummy atoms (D) located at the vertices of an octahedron, as shown with the inset.

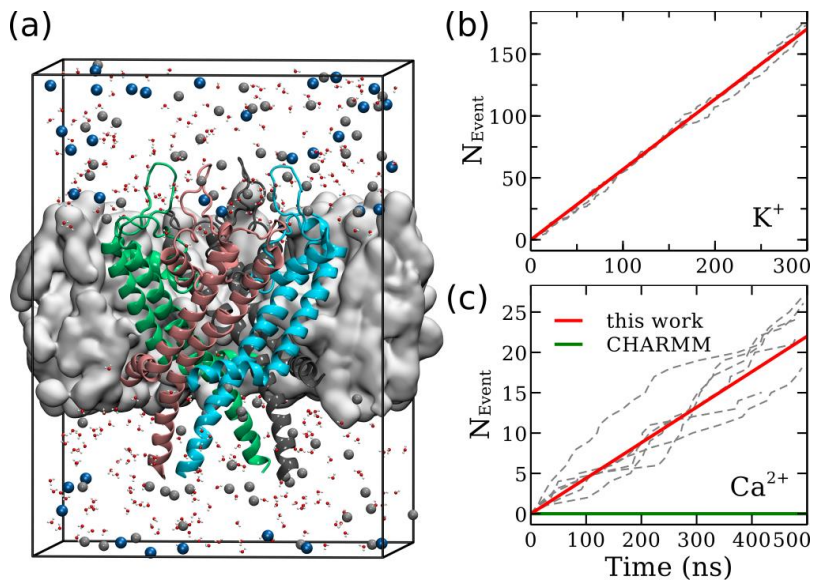

**Figure 2.** (a) The simulation system of Ca<sup>2+</sup> (gray spheres) permeation through the RyR1 channel. The pore domain of RyR1 (cartoon) is embedded in a POPC membrane (gray surface). (b) The cumulative number of K<sup>+</sup> ions permeating through the RyR1 channel as a function of simulation time. The dashed gray lines correspond to three independent simulation trajectories, and the solid red line corresponds to the average conductance. The conductance calculated from these trajectories is  $910 \pm 39$  pS. (c) Same as (b) but for Ca<sup>2+</sup> ions. The conductance from six trajectories is  $141 \pm 30$  pS with our Ca<sup>2+</sup> model.

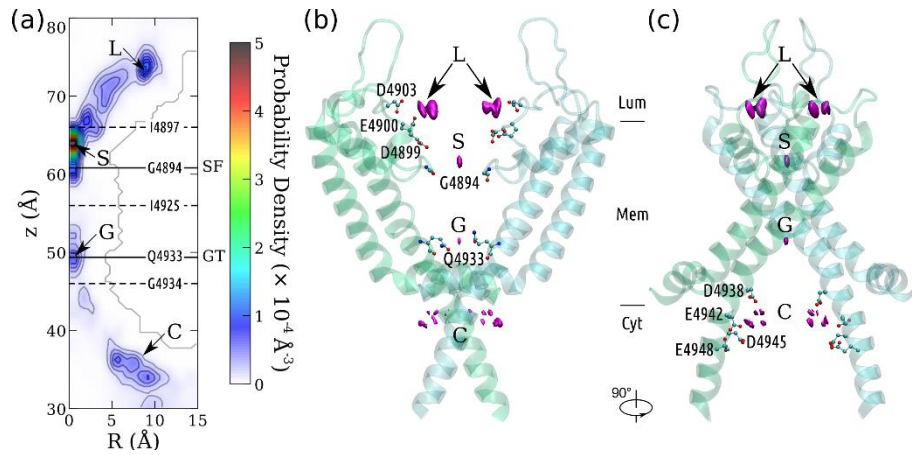

**Figure 3.** The Ca<sup>2+</sup> binding sites in the RyR1 channel. (a) The contour plot of Ca<sup>2+</sup> density on the R-z plane around RyR1. Four binding sites within the pore are designated as L, S, G, and C. The positions of the selectivity filter (SF) and gate (GT) constrictions are indicated with solid lines. The ion channel is divided into chambers by the dashed lines at the density saddles. The pore residues in close proximity are labeled on these lines. (b) & (c) Side views of the RyR1 channel. Only two chains are shown for clarity. The bottleneck residues (GLY-4894 at SF and GLN-4933 at GT), and the negatively charged residues at the binding sites L and C are shown as ball-and-sticks.

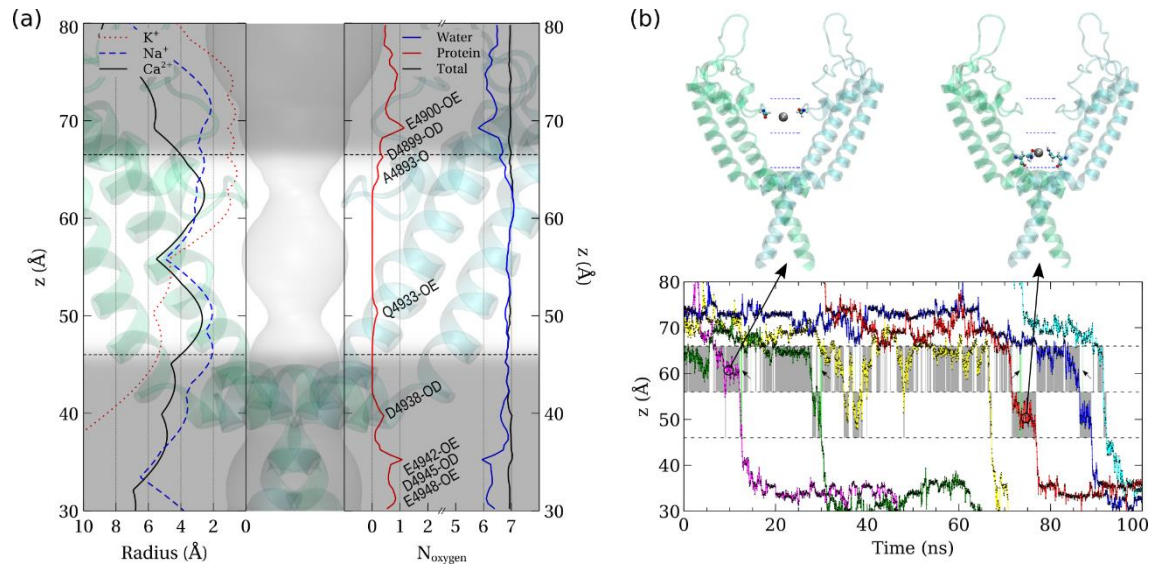

**Figure 4.** (a) The left panel shows the pore radii along the pore axis of the open-state RyR1 (black solid), K<sup>+</sup> channel (red dotted), and Na<sup>+</sup> channel (blue dashed). The right panel shows the total number (black) of coordinated oxygen atoms around the calcium ions within the pore, and the contributions from protein (red) and water (blue) respectively. The significant contributions from protein oxygen are marked with corresponding protein residue IDs containing the oxygen. The transparent background shows the pore profile within the open-state RyR1 structure, and the narrow pore region is highlighted between the black dashed lines. (b) Evolution of the z coordinates when Ca<sup>2+</sup> ions (in different colors) permeate through the RyR1 channel from a typical segment of simulated trajectory. The occupied chamber accommodating either the selectivity filter or gate is shaded in gray unless both of them are occupied, which is indicated by green bars depicted with small arrows. Representative configurations with one of the chambers occupied by a Ca<sup>2+</sup> ion (in silver) are shown above.

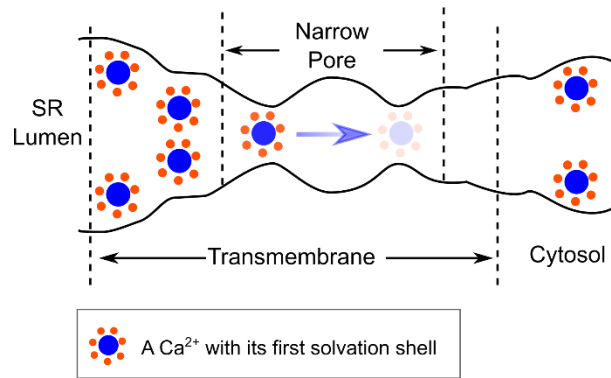

**Figure 5.** A sketch of the  $\text{Ca}^{2+}$  permeation mechanism of RyR1. There is only one  $\text{Ca}^{2+}$  in the narrow pore region, with a longer residence time at the selectivity filter constriction site (darker color), and a shorter residence time at the gate constriction (lighter color).

## Supplementary Information

**Table S1.** The optimized parameters (1<sup>st</sup> row), target experimental properties (2<sup>nd</sup> row), property weights (3<sup>rd</sup> row), and theoretical values (4<sup>th</sup> row) calculated using the optimized parameters.

| $b_{CD}$                | $Q_C$ | $\epsilon_C^W$ | $\sigma_C^W$ | $\epsilon_C^{NW}$ | $\sigma_C^{NW}$ | $\epsilon_D$    | $\sigma_D$ |
|-------------------------|-------|----------------|--------------|-------------------|-----------------|-----------------|------------|
| (nm)                    | (e)   | (kJ/mol)       | (nm)         | (kJ/mol)          | (nm)            | (kJ/mol)        | (nm)       |
| $\Delta G_h^e$ (kJ/mol) |       | $R_1^e$ (nm)   |              | $N_C^e$           |                 | $\tau_R^e$ (ps) |            |
| -1504.0                 |       | 0.242          |              | 7.0               |                 | ~100            |            |
| $\Delta G_h^W$ (kJ/mol) |       | $R_1^W$ (nm)   |              | $N_C^W$           |                 | $\tau_R^W$ (ps) |            |
| 5.0                     |       | 0.002          |              | 0.25              |                 | 50              |            |
| $\Delta G_h^t$ (kJ/mol) |       | $R_1^t$ (nm)   |              | $N_C^t$           |                 | $\tau_R^t$ (ps) |            |
| -1503.9                 |       | 0.2422         |              | 6.99              |                 | 75              |            |



**Table S2.** The parameter space scanned for the optimization of the multi-site  $\text{Ca}^{2+}$  model.

| $b_{CD}$     | $Q_C$   | $\varepsilon_C$ | $\sigma_C$   | $\varepsilon_D$ | $\sigma_D$ |
|--------------|---------|-----------------|--------------|-----------------|------------|
| (nm)         | (e)     | (kJ/mol)        | (nm)         | (kJ/mol)        | (nm)       |
| [0.05, 0.15] | [-8, 2] | [0.1, 10.1]     | [0.20, 0.32] | [0.1, 10.1]     | < 0.01     |

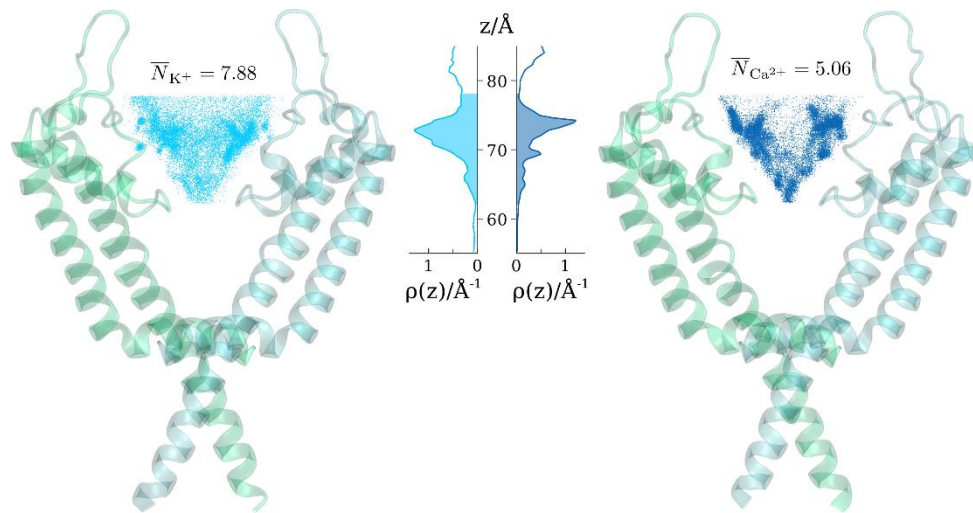

**Figure S1.** The average number of ions occupying the selectivity filter of RyR1. The number was calculated for  $K^+$  (left) or  $Ca^{2+}$  (right) in the presence of a 100-mv transmembrane potential. The ions located above the selectivity filter constriction site and within the pore were considered. The positions of the ions, represented by dots in the protein structures, were sampled from  $6 \times 500$ -ns trajectories ( $Ca^{2+}$ ) and  $3 \times 300$ -ns trajectories ( $K^+$ ) with a ratio corresponding to their average occupying number. The ion number densities along the channel axis were given in the middle panel, and the integration of the shaded area yielded the average number of ions within the filter. In this figure,  $K^+$  and  $Ca^{2+}$  are referred to by the cyan and blue colors, respectively.
